Anesthesiology  
56:234, 1982

*In reply:*—We appreciate Dr. Karis's interest in our recent letter. I believe he underestimates somewhat the amount of heat a humidifier can deliver, for he has forgotten that when gas fully saturated at 47°C cools in the respiratory tract, water condenses giving up the heat of vaporization. Five liters of gas fully saturated at 47°C contains  $80/760 \times 5,000 = 526$  ml water vapor ( $P_{H_2O}$  at 47°C = 80 mmHg). When this gas is cooled to 37°C in a patient's respiratory tract, it will deliver  $526 - 309 = 217$  ml (0.159 g) of water as well as 92 calories from the condensation of the water. Compared to cold dry gas, the total calorie saving would be 264 cal/min at  $\dot{V}_I$  of 5,000 ml. We would use a  $\dot{V}_I$  of 7,000 ml in a 70-kg individual (dead-space gas must be included in heat calculations) and I therefore calculate the calorie saving from humidification to be 22,176 cal/h. Noback and Tinker<sup>1</sup> suggest that the drop in core temperature post-bypass is due to a loss of heat from the "core" to other parts of the body which are insufficiently rewarmed. If we assume the "core" consists of the vessel rich group (9 per cent body weight) plus the total intravascular volume (7 per cent body weight), then we are delivering

enough heat to prevent a 2°C/h drop in core temperature.

Mathematics aside, the technique works. Dr. Karis suggests we employ other more efficient measures but this is unlikely. We do use a warming blanket but have found as did Noback that it has little effect on core temperature. Our operating room is at 18°C and our patients are uncovered from chin to feet during the procedure. We still believe the technique is as safe in the adult population as it is in the pediatric age group and has proven effective not only in open heart patients but in those undergoing major intraabdominal procedures where heat loss is a problem.

ROBERT D. CRAWFORD, M.D.  
Department of Anesthesiology  
The Mason Clinic  
Seattle, Washington 98101

#### REFERENCES

1. Noback CR, Tinker JH: Hypothermia after cardiopulmonary bypass in man. *ANESTHESIOLOGY* 53:277-280, 1980

(Accepted for publication September 8, 1981.)

Anesthesiology  
56:234-235, 1982

### Nitrous Oxide As an Anti-stress Agent?

*To the Editor:*—The paper by Roizen *et al.* seems to highlight the possibility that the anti-stress effects of the anesthetic agents used may well have been partially mediated by the nitrous oxide ( $N_2O$ ) used as the common anesthetic vehicle.<sup>1</sup>

It has been shown both *in vivo*<sup>2,3</sup> and *in vitro*,<sup>4</sup> that  $N_2O$  at analgesic doses is an opiate agonist. The concentration of  $N_2O$  used in the study falls within the limits which could be considered analgesic.

It has been shown experimentally that there is an inhibitory feedback mechanism mediated by the adrenergic and opiate system involving the locus coeruleus,<sup>5</sup> and arcuate nucleus of the hypothalamus,<sup>6</sup> respectively. The anti-stress effect reported here may have been caused by the activation of this feedback mechanism by an opiate agonist.

There is some experimental evidence in man that  $N_2O$

analgesia has anti-stress properties.<sup>7,8</sup> In addition, a number of conditions with a large stress component such as postoperative pain,<sup>9</sup> asthma,<sup>10</sup> and the alcoholic withdrawal state<sup>11</sup> have been successfully treated with  $N_2O$  analgesia.

The effectiveness of  $N_2O$  in postoperative pain control<sup>9</sup> may not only result from its analgesic effect, but also by diminishing the excessive response to stress.

M. A. GILLMAN  
D. S. FOOTERMAN  
F. J. LICHTIGFELD

Department of Clinical and Experimental  
Pharmacology University of the Witwatersrand  
Hospital Street, Johannesburg, South Africa
